# Supplementary material for: Microclimate and Vegetation Structure Significantly Affect Butterfly Assemblages in a Tropical Dry Forest
Source: MDPI journal article supplement (doi:10.3390/cli11110220), 2023-11-02
Supplement: s1 [file s1]

# Microclimate and Vegetation Structure Significantly Affect Butterfly Assemblages in a Tropical Dry Forest

Anirban Mahata <sup>1</sup>, Rajendra Mohan Panda <sup>2</sup>, Padmanava Dash <sup>3, \*</sup>, Ayusmita Naik <sup>1</sup>, Alok Kumar Naik <sup>1</sup>, and Sharat Kumar Palita <sup>1, \*</sup>

<sup>1</sup> Department of Biodiversity and Conservation of Natural Resources, Central University of Odisha-764021, Odisha, India

<sup>2</sup> Department of Integrative Biology, University of South Florida, Tampa, FL 33613, USA

<sup>3</sup> Department of Geosciences, Mississippi State University, Mississippi State, MS 39762, USA

\* Correspondence: PD: pd175@msstate.edu; SKP: skpalita@gmail.com

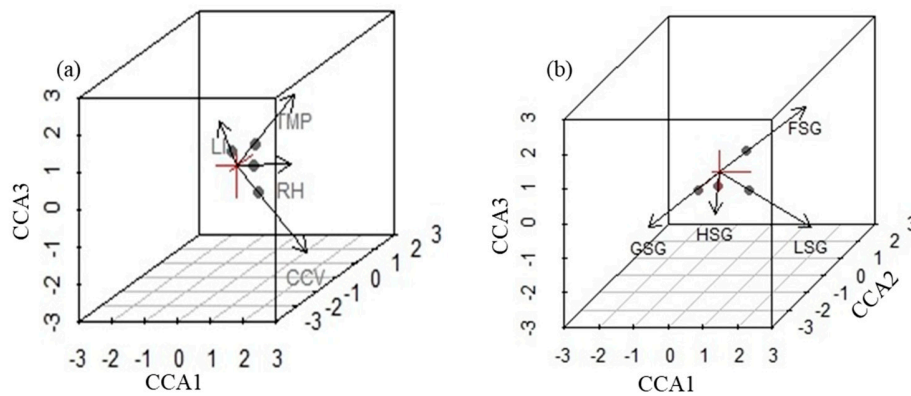

**Figure S1.** Three-dimensional ordination diagram between butterfly richness and (a) microclimatic variables and (b) disturbance parameters, derived using canonical correspondence analysis.

Abbreviations: light intensity (LI), relative humidity (RH), canopy cover (CCV) and temperature (TMP), fire signs (FSG), logging signs (LSG) and grazing signs (GSG).

**Table S1** Grid locations, habitat types and description statistics of their associated parameters: elevation (ELV), canopy cover (CC), temperature (TMP), relative humidity (RH), light intensity (LI), wind speed (WS), human signs (HS), Grazing signs (GS), logging signs (LS), fire signs (FS)

| Grid No | GPS Location             | Habitat         | ELV (m)          | CC (%)           | TMP (°C)         | RH (%)           | LI (x100 lux)     | WS (m/s)        | HS           | GS             | LS            | FS           | Species richness | Species abundance |
|---------|--------------------------|-----------------|------------------|------------------|------------------|------------------|-------------------|-----------------|--------------|----------------|---------------|--------------|------------------|-------------------|
| 1       | 19.10813 N<br>82.48029 E | Open forest     | 596.75<br>± 3.75 | 28.19 ±<br>6.65  | 34.725<br>± 1.16 | 54.1 ±<br>3.98   | 936 ± 5           | 1.04 ±<br>0.41  | 0            | 0.25 ±<br>0.25 | 0.5 ±<br>0.5  | 0            | 12               | 44                |
| 2       | 19.12192 N<br>82.37001 E | Open forest     | 590.33<br>± 1.56 | 33.65 ±<br>6.76  | 39.58 ±<br>0.54  | 36.282<br>± 1.45 | 982 ± 187         | 0.64 ±<br>0.29  | 0            | 0              | 2.4 ±<br>1.29 | 0            | 9                | 57                |
| 3       | 18.83887 N<br>82.61657 E | Dense forest    | 816.2 ±<br>5.71  | 40.102 ±<br>3.57 | 33.18 ±<br>0.84  | 52.22<br>± 2.53  | 261.6 ±<br>101.57 | 0.842<br>± 0.25 | 0            | 0              | 0.8 ±<br>0.8  | 0.8 ±<br>0.8 | 21               | 61                |
| 4       | 18.79784 N<br>82.58238 E | Open forest     | 779.6 ±<br>4.24  | 8.948 ±<br>4.76  | 39.48 ±<br>1.01  | 36.54<br>± 1.61  | 818.8 ±<br>26.97  | 1.1 ±<br>0.45   | 0            | 0              | 0             | 0            | 10               | 35                |
| 5       | 18.89708 N<br>82.66951 E | Open forest     | 748.5±<br>5.5    | 19.81 ±<br>5.54  | 28.05 ±<br>0.05  | 51.1 ±<br>0.4    | 72 ± 1.52         | 0.905<br>± 0.45 | 0            | 0              | 0             | 0            | 4                | 7                 |
| 6       | 18.94711 N<br>82.644 E   | Open forest     | 678.2 ±<br>9.57  | 20.25 ±<br>6.43  | 33.96 ±<br>0.82  | 51.08<br>± 3.37  | 725.8 ±<br>88.10  | 1.05 ±<br>0.49  | 0.2 ±<br>0.2 | 0              | 1.4 ±<br>0.98 | 0.4 ±<br>0.4 | 7                | 15                |
| 7       | 18.86915 N<br>83.16004 E | Open forest     | 358 ± 0          | 11.48 ±<br>1.15  | 33.2 ±<br>0.1    | 64 ± 2           | 173 ± 73          | 0               | 5 ± 1        | 2 ± 1          | 0             | 0            | 8                | 111               |
| 8       | 18.91092 N<br>83.15811 E | Riparian forest | 375 ±<br>3.03    | 40.32 ±<br>20.48 | 33.13 ±<br>0.47  | 59.80<br>± 2.40  | 339 ± 83          | 0.07 ±<br>0.07  | 0            | 0              | 0             | 0            | 16               | 144               |
| 9       | 18.7479 N<br>82.52603 E  | Dense forest    | 751.4 ±<br>39.77 | 39.75 ±<br>6.16  | 33.07 ±<br>0.52  | 60.08<br>± 1.85  | 626 ±<br>70.10    | 0.81 ±<br>0.21  | 0            | 0              | 1.4 ±<br>0.98 | 0.8 ±<br>0.8 | 6                | 21                |
| 10      | 18.71032 N<br>82.56892 E | Dense forest    | 907.5 ±<br>1.19  | 47.79 ±<br>6.43  | 34.6 ±<br>0.17   | 50.83<br>± 0.92  | 544.25 ±<br>109   | 1.07 ±<br>0.28  | 0            | 0              | 0.5 ±<br>0.29 | 0            | 9                | 39                |
| 11      | 18.70752 N<br>82.57062 E | Open forest     | 619.2 ±<br>1.06  | 27.96 ± 3        | 36.76 ±<br>0.4   | 48.88<br>± 1.28  | 695.6 ±<br>37.06  | 0.65 ±<br>0.31  | 0            | 0              | 1.2 ±<br>0.58 | 2.8 ±<br>1.5 | 9                | 20                |
| 12      | 18.91928 N<br>82.27573 E | Open forest     | 529.2 ±<br>6.24  | 29.49 ±<br>6.34  | 40.96 ±<br>0.78  | 27.70<br>± 1.39  | 896.2 ±<br>10.44  | 0.47 ±<br>0.24  | 0            | 0              | 1.8 ±<br>0.8  | 0.2 ±<br>0.2 | 9                | 18                |

|    |                          |                    |                    |                  |                 |                 |                   |                |                   |               |                |               |    |     |
|----|--------------------------|--------------------|--------------------|------------------|-----------------|-----------------|-------------------|----------------|-------------------|---------------|----------------|---------------|----|-----|
| 13 | 19.01481 N<br>83.15844 E | Dense<br>forest    | 858 ± 1            | 36.47 ±<br>7.92  | 33.57 ±<br>0.23 | 52.37<br>± 3.68 | 601 ±<br>60.52    | 0.09 ±<br>0.09 | 0                 | 0             | 0.33 ±<br>0.33 | 0             | 18 | 83  |
| 14 | 18.98735 N<br>83.14435 E | Open<br>forest     | 762.2 ±<br>6.42    | 13.28 ±<br>7.8   | 37.38 ±<br>0.63 | 41.78<br>± 1.16 | 697 ±<br>56.44    | 0.17 ±<br>0.11 | 1.6 ±<br>0.98     | 0             | 0              | 0             | 24 | 113 |
| 15 | 18.99159 N<br>83.07821 E | Dense<br>forest    | 1026.75<br>± 15.67 | 39.37 ±<br>4.75  | 34.73 ±<br>0.64 | 44.85<br>± 1.72 | 356.5 ±<br>106.9  | 0.27 ±<br>0.22 | 0                 | 0             | 0.5 ±<br>0.5   | 0             | 15 | 22  |
| 16 | 18.35035 N<br>82.72384 E | Dense<br>forest    | 917 ±<br>9.70      | 35.37 ± 3        | 37.14 ±<br>0.44 | 43.92<br>± 1.22 | 653.8 ±<br>38.08  | 0.36 ±<br>0.19 | 0                 | 0             | 2.4 ±<br>1.29  | 0             | 16 | 131 |
| 17 | 18.24864 N<br>82.62625 E | Open<br>forest     | 928.6 ±<br>16.37   | 24.12 ±<br>11.49 | 34.44 ±<br>1.44 | 42.4 ±<br>6.78  | 38 ± 1.87         | 0.12 ±<br>0.12 | 0                 | 0             | 0.4 ±<br>0.4   | 0.6 ±<br>0.6  | 13 | 29  |
| 18 | 19.11242 N<br>82.7441 E  | Open<br>forest     | 610.2 ±<br>2.42    | 34.96 ±<br>2.77  | 33.02 ±<br>0.09 | 59.26<br>± 1.20 | 442.4 ±<br>17.76  | 0.90 ±<br>0.19 | 0                 | 0             | 0.6 ±<br>0.4   | 0             | 14 | 29  |
| 19 | 19.10444 N<br>82.75983 E | Open<br>forest     | 639 ±<br>2.54      | 27.35 ±<br>4.41  | 35.15 ±<br>0.17 | 55.93<br>± 0.73 | 560.25 ±<br>9.29  | 0.25 ±<br>0.25 | 0.25<br>±<br>0.25 | 0             | 4 ±<br>1.35    | 0             | 7  | 21  |
| 20 | 19.11848 N<br>82.67794 E | Open<br>forest     | 587.8 ±<br>1.71    | 74.03 ±<br>3.13  | 37.82 ±<br>0.3  | 50.24<br>± 0.8  | 643.4 ±<br>34.26  | 0.31 ±<br>0.16 | 0.8 ±<br>0.8      | 0             | 8.4 ± 4        | 0             | 12 | 36  |
| 21 | 19.03167 N<br>82.70724 E | Open<br>forest     | 589.2 ±<br>6.4     | 16.42 ±<br>8.43  | 34.88 ±<br>0.07 | 57.58<br>± 0.79 | 209.8 ±<br>7.7    | 1.33 ±<br>0.16 | 0.4 ±<br>0.4      | 1.2 ±<br>1.2  | 0.6 ±<br>0.4   | 0.2 ±<br>0.2  | 12 | 24  |
| 22 | 19.03606 N<br>82.70812 E | Open<br>forest     | 836 ±<br>11.43     | 26.28 ±<br>4.04  | 33.76 ±<br>0.33 | 44.14<br>± 1.06 | 591.6 ±<br>32.81  | 3.96 ±<br>3.36 | 0                 | 1.6 ±<br>0.98 | 1.2 ±<br>0.73  | 0.2 ±<br>0.2  | 17 | 55  |
| 23 | 18.52395 N<br>82.45019 E | Dense<br>forest    | 779.8 ±<br>9.99    | 38.91 ±<br>2.86  | 31.7 ±<br>0.34  | 63.18<br>± 1.89 | 358.2 ±<br>61.40  | 0.92 ±<br>0.11 | 0                 | 0             | 6.2 ±<br>2.48  | 2.6 ±<br>1.54 | 7  | 17  |
| 24 | 18.62047 N<br>82.46129 E | Open<br>forest     | 788.6 ±<br>15.40   | 25.34 ±<br>8.62  | 36.06 ±<br>0.72 | 53.36<br>± 2.71 | 691.4 ±<br>62.16  | 0.33 ±<br>0.12 | 0                 | 0             | 1.4 ±<br>0.75  | 1.2 ±<br>1.2  | 13 | 51  |
| 25 | 18.73577 N<br>82.42192 E | Open<br>forest     | 639.4 ±<br>9.43    | 32.35 ±<br>5.63  | 34.08 ±<br>0.05 | 57.24<br>± 1.45 | 60.2 ±<br>10.54   | 0.08 ±<br>0.05 | 0.4 ±<br>0.4      | 4 ± 4         | 1.6 ±<br>0.6   | 0             | 7  | 15  |
| 26 | 18.66267 N<br>82.34207 E | Riparian<br>forest | 477.4 ±<br>11.06   | 30.76 ±<br>19.76 | 34.14 ±<br>1.11 | 64.64<br>± 4.49 | 556.6 ±<br>135.75 | 0.85 ±<br>0.79 | 0                 | 0.8 ±<br>1.79 | 1.4 ±<br>2.07  | 0.4 ±<br>0.55 | 21 | 65  |

|    |                          |                    |                    |                  |                 |                 |                   |                |              |              |                |              |    |    |
|----|--------------------------|--------------------|--------------------|------------------|-----------------|-----------------|-------------------|----------------|--------------|--------------|----------------|--------------|----|----|
| 27 | 18.69131 N<br>82.37717 E | Open<br>forest     | 610 ±<br>0.58      | 30.86 ±<br>3.04  | 36.22 ±<br>0.22 | 56.68<br>± 0.65 | 460.8 ±<br>89.26  | 0.67 ±<br>0.21 | 0            | 0            | 4.6 ±<br>1.33  | 0.4 ±<br>0.4 | 12 | 19 |
| 28 | 18.7657 N<br>82.34219 E  | Dense<br>forest    | 643.8 ±<br>1.39    | 42.46 ±<br>4.28  | 35.53 ±<br>0.27 | 58.23<br>± 1.3  | 232.4 ±<br>67.09  | 0.36 ±<br>0.14 | 0            | 0            | 1.2 ±<br>0.8   | 0            | 9  | 13 |
| 29 | 18.49982 N<br>83.01994 E | Open<br>forest     | 871.2 ±<br>11.11   | 16.48 ±<br>6.86  | 32.66 ±<br>0.43 | 68.42<br>± 2.02 | 262.2 ±<br>38.05  | 0.73 ±<br>0.66 | 0            | 0.8 ±<br>0.8 | 0.4 ±<br>0.25  | 0            | 17 | 53 |
| 30 | 18.46912 N<br>83.0109 E  | Open<br>forest     | 764.2 ±<br>7.93    | 29.79 ±<br>3.64  | 33.5 ±<br>0.2   | 58.62<br>± 1.49 | 135.8 ±<br>13.85  | 0.29 ±<br>0.18 | 0.2 ±<br>0.2 | 0            | 1.8 ±<br>0.92  | 0            | 23 | 72 |
| 31 | 18.81511 N<br>82.16915 E | Riparian<br>forest | 381.12<br>± 0.1    | 45.42 ±<br>10.64 | 34.54 ±<br>0.53 | 56.86<br>± 2.13 | 226.2 ±<br>128.72 | 0.06 ±<br>0.03 | 0            | 0            | 0              | 0            | 23 | 68 |
| 32 | 18.9017 N<br>82.60196 E  | Riparian<br>forest | 681.83<br>± 5.53   | 27.33 ±<br>8.26  | 34.76 ±<br>0.57 | 50.62<br>± 1.65 | 381.8 ±<br>138.94 | 0.35 ±<br>0.15 | 0            | 0            | 0              | 0            | 14 | 49 |
| 33 | 18.55094 N<br>82.75653 E | Riparian<br>forest | 955.93<br>± 16.83  | 18.92 ±<br>8.50  | 32.94 ±<br>0.32 | 41.66<br>± 0.93 | 814.4 ±<br>78.45  | 0.17 ±<br>0.08 | 0            | 0            | 0              | 0            | 16 | 35 |
| 34 | 18.82966 N<br>82.16823 E | Riparian<br>forest | 470 ±<br>0.46      | 28.93 ±<br>7.38  | 28.36 ±         | 64.2 ±<br>0.21  | 211.8 ±<br>122.26 | 0.35 ±<br>0.16 | 0            | 0            | 0              | 0.2 ±<br>0.2 | 9  | 39 |
| 35 | 18.64676 N<br>83.00731 E | Riparian<br>forest | 1273.65<br>± 13.81 | 40.90 ±<br>4.73  | 26.93 ±<br>0.92 | 43.53<br>± 4.03 | 282 ±<br>59.18    | 0.41 ±<br>0.18 | 0            | 0            | 1.25 ±<br>0.63 | 0            | 6  | 6  |

---
